# 1 Lossless Immunocytochemistry using Photo-polymerized Hydrogel Thin-films

2  
3  
4 Jeong Hyun Lee<sup>1,2</sup>, Aline T. Santoso<sup>1,2,3</sup>, Emily S. Park<sup>1,2,3,4</sup>, Kerry Matthews<sup>1,2</sup>, Simon P.  
5 Duffy<sup>1,2</sup> and Hongshen Ma<sup>1,2,3,4\*</sup>

## 6 **Affiliations:**

7 <sup>1</sup> Department of Mechanical Engineering, University of British Columbia

8 <sup>2</sup> Centre for Blood Research, University of British Columbia, Vancouver, BC, Canada

9 <sup>3</sup> School of Biomedical Engineering, University of British Columbia, Vancouver, BC, Canada

10 <sup>4</sup> Vancouver Prostate Centre, Vancouver General Hospital, Vancouver, BC, Canada

11 \* Correspondence should be addressed to Hongshen Ma ([hongma@mech.ubc.ca](mailto:hongma@mech.ubc.ca))

12  
13  
14  
15  
16 **Short title:** Lossless Immunocytochemistry

## 17 **Abstract**

18  
19  
20 Immunocytochemistry (ICC), or immunofluorescence microscopy, is an essential biological  
21 technique for phenotyping cells in both research and diagnostic applications. Standard ICC  
22 methods often do not work well when the cell sample contains a small number of cells (<10,000)  
23 because of the significant cell loss that occurs during washing, staining, and centrifugation steps.  
24 Cell loss is particularly relevant when working with rare cells, such as circulating tumor cells,  
25 where such losses could significantly bias experimental outcomes. In order to eliminate cell loss  
26 in ICC protocols, we present a method to encapsulate the cell sample in a photo-polymerized  
27 hydrogel thin-film. The hydrogel thin-film is permeable to antibodies and other ICC reagents,  
28 thereby allowing the use of standard ICC protocols without modification. The cell sample is  
29 physically constrained by the hydrogel at the bottom surface of a standard (unmodified) imaging  
30 microtiter plate, thereby enabling the acquisition of high-quality micrographs regardless of the  
31 properties of the cell sample or staining reagents. Furthermore, while standard ICC requires several  
32 centrifugation steps during staining and washing, our hydrogel encapsulation method requires only  
33 a single centrifugation step. This property greatly reduces the time required to perform ICC  
34 protocols and is more compatible with robotic platforms. In this study, we show that standard ICC  
35 and Cytospin protocols are extremely lossy (>70% loss) when the sample contains less than 10,000  
36 cells, while encapsulating the cells using a permeable hydrogel thin-film results in a lossless ICC  
37 process.

38

39

40

## Lossless Immunocytochemistry

### 41 **Introduction**

42 Immunocytochemistry (ICC), or immunofluorescence microscopy, is an essential biological assay  
43 that uses fluorescence-conjugated antibodies to label cells in order to phenotype them based on  
44 protein expression and localization. This assay involves repeated exchange of reagents for cell  
45 fixation, permeabilization, blocking, immunostaining, as well as additional buffer washes between  
46 each step. When the specimen contains a large number of cells (typically  $>10^5$  cells per ml), there  
47 is sufficient cell density to form a pellet during centrifugation, which enables supernatant removal  
48 by pipetting or decanting the fluid. However, when there are fewer cells, the cell density is too low  
49 to pellet and many cells may be lost during each supernatant removal step. This issue is particularly  
50 important when working with precious samples, where the specimen is limited, or where target  
51 cells are rare. For example, detecting circulating tumor cells (CTCs) in the blood of cancer  
52 patients<sup>1-4</sup> or fetal cells in maternal blood<sup>5</sup>, require immunostaining of exceedingly rare cells,  
53 where the loss of potential target cells cannot be tolerated.

54 Numerous modifications of the conventional ICC protocol have been developed to prevent cell  
55 loss. One approach is to chemically attach cells on a glass slide coated with an adhesive, such as  
56 poly-L-lysine, fibronectin, or Cell-tak<sup>6-8</sup>, and then perform the ICC protocol directly on the glass  
57 slide. This approach works well for adherent cells grown in culture, but the adhesives are typically  
58 ineffective for primary cells or cultured suspension cells. An alternative approach is Cytospin<sup>TM</sup>,  
59 which physically adheres cells to a glass slide using centrifugal force<sup>9,10</sup>. While both primary cells  
60 and cells grown in culture can be adhered to a glass slide, this process contributes to significant  
61 cell loss. Specifically, when the cell number is relatively small ( $<10^5$  cells per ml), previous studies  
62 have reported losses of  $>75\%$ <sup>11</sup>. Additionally, Cytospin is a serial process performed one sample  
63 at a time, which significantly limits experimental throughput in screening studies<sup>12</sup>. Finally, while

## Lossless Immunocytochemistry

64 Cytospin deposits cells in a confined region on a slide, the deposition area typically requires  
65 capturing many microscopy fields to image, which adds to the time required for imaging.  
66 Therefore, when the sample contains a small number of cells, concentrating cells in a smaller  
67 imaging area can significantly reduce imaging time.

68 Here, we present a method to prevent cell loss during ICC by encapsulating cells in a hydrogel  
69 thin-film. This approach has been used previously by encapsulating cells in low-melt agarose<sup>13</sup>,  
70 which forms a hydrogel matrix that is optically transparent and permeable to ICC reagents.  
71 However, this approach has not been widely adopted because the viscosity of agarose solutions  
72 which prevent the alignment of cells to a precision surface for imaging. Instead, the agarose  
73 hydrogel must be sectioned to image the cells from each optical plane. In this study, we present a  
74 cell encapsulation material that has lower density than typical cells in order to enable the alignment  
75 of cells by centrifugation to a single layer on the bottom surface of a standard and unmodified  
76 imaging microtiter plate. This material is permeable to immunoglobulins, optically transparent  
77 with minimal coloration and auto-fluorescence, and mechanically robust to withstand repeated  
78 washing. Through additional experiments, we show that the lossless ICC process is able to (i)  
79 retain and stain 100% of the cell sample, (ii) confine the cell sample into a small area for rapid  
80 high-quality imaging, and (iii) can be performed with only a single centrifugation step.

81

## Lossless Immunocytochemistry

### 82 **Results and Discussion**

83 Our general approach is to mix cells in a pre-polymer solution that can be crosslinked into a  
84 hydrogel upon ultraviolet(UV) light exposure. To enable lossless ICC, the prepolymer solution  
85 must be less dense than cells to allow them to sink to the imaging surface via centrifugation. The  
86 hydrogel thin film must have sufficient mechanical strength to withstand normal pipetting. Finally,  
87 the hydrogel must be sufficiently thin and porous to allow the diffusion of immunoglobulins in a  
88 reasonable timeframe (~1 hour)(Figure 1).

### 89 **Density Testing**

90 In order to align cells by centrifugation to a single layer on the bottom glass surface of the imaging  
91 microtiter plate, the cell capture solution density must be less than that of typical cells. Given that  
92 the lowest density cells are likely to be monocytes, which have a density between 1.067 and 1.077  
93 g/ml<sup>28</sup>, the cell capture solution should be less than 1.067 g/ml in density. Also, the density must  
94 be higher than 1 g/ml to sink and encapsulate the cells in bottom plane. We aimed the density of  
95 cell capture solution as 1.058 g/ml.

### 96 **Mechanical Strength Testing**

97 The mechanical strength of the hydrogel thin-film is important for retaining its structural integrity  
98 during pipetting. This property was tested by repeatedly pipetting 40 µl of PBS onto the surface of  
99 the photopolymerized hydrogel until signs of structure disintegration, such as cracks, tears, and  
100 delamination, began to be observable. The polymerized hydrogel thin-film had sufficient  
101 mechanical strength to survive >100 rounds of repeated pipetting.

102

## Lossless Immunocytochemistry

### 103 **Porosity Testing**

104 Immunoglobulins have an estimated size of  $\sim 14$  nm<sup>14,15</sup>. The porosity of hydrogel thin-film must  
105 be sufficiently large to permit diffusion of immunoglobulins to the cell sample in a reasonable  
106 amount of time. Conventional method for producing macroporous hydrogels include freeze-  
107 drying, solvent casting, and gas forming<sup>16-21</sup>. While these methods have been used in tissue  
108 engineering applications to produce hydrogels with  $>100$   $\mu\text{m}$  pores<sup>22-26</sup>, these hydrogels have poor  
109 mechanical strength and image quality<sup>27</sup>, which makes them incompatible with immunostaining  
110 of embedded cells. We evaluated whether ICC could be performed on cells embedded in lossless  
111 hydrogel by embedding 22RV1 cancer cells and then using fluorophore-conjugated antibodies to  
112 stain the extracellular EpCAM protein, and the intracellular cytokeratin proteins. The 90% of cells  
113 were stained after 1 hour incubation.

### 114 **Thickness Testing**

115 In addition to porosity, the thickness of the hydrogel thin-film is important for determining the  
116 time required for immunoglobulin diffusion. Immunoglobulin stains are introduced on the top  
117 surface of the hydrogel and must diffuse to cells located at the bottom surface of the hydrogel,  
118 which interfaces with the glass substrate. The thickness of the hydrogel thin-film can be controlled  
119 by the UV light intensity and exposure time. Based on the Beer-Lambert law, UV light intensity  
120 diminishes exponentially as it penetrates absorbing material. Therefore, UV light applied at the  
121 bottom of the imaging plate polymerizes a hydrogel thin-film with thickness directly controlled by  
122 exposure time. We tested hydrogel thin-film formation by exposure using a long-wavelength UV  
123 LED ( $\lambda=375$  nm) for 1, 3, 5, 7, or 10 seconds. We also tested hydrogel thin-film formation by  
124 exposure using standard UV gel imaging system ( $\lambda=302$  nm) for 5, 10, 15, 20, and 30 seconds.

## Lossless Immunocytochemistry

125 The hydrogel thickness was then estimated by first focusing on a cell along the imaging plate  
126 surface and then the top hydrogel surface. The z-position of each focal point was obtained from  
127 Nikon NIS-BR software and used to estimate the distance between the two points. Three  
128 measurements were performed for each experimental condition. Using an UV LED, exposure for  
129 1 and 3 s failed to form a hydrogel, while 5, 7, and 10 s exposures produced hydrogels with  
130 thickness of 100 +/- 20  $\mu\text{m}$ , 500 +/- 20  $\mu\text{m}$ , and 1000 +/- 20  $\mu\text{m}$ , respectively. Therefore, we  
131 selected the 5 s as the optimal exposure time for UV LED source because it produced a stable  
132 hydrogel while minimizing UV exposure and minimizing hydrogel thickness. When using the UV  
133 gel imaging system, exposure <20 seconds failed to form a hydrogel, while 20 seconds exposure  
134 produced 100 +/- 20  $\mu\text{m}$  thickness hydrogel and 30 seconds exposure produced 300 +/- 20  $\mu\text{m}$   
135 thickness hydrogel. Therefore, for gel imaging system, we used an exposure time of 20 seconds to  
136 minimize hydrogel thickness.

### 137 **Immunocytochemistry of Hydrogel Encapsulated Cell Samples**

138 To evaluate this cell fixation method for use in immunocytochemistry, we first mixed the cell  
139 sample with the prepolymer solution in a glass-bottom imaging well plate and then centrifuged the  
140 well plate to align the cells on the surface of the glass. Next, the hydrogel thin-film is formed using  
141 a 5 s UV exposure, at which point, the specimen is immunostained using standard ICC reagents  
142 (Figure 2). Since previous efforts to visualize cells in macroporous hydrogels have been limited  
143 by image quality<sup>27</sup>, we first evaluated the image quality of hydrogel encapsulated cells by bright  
144 field microscopy. While the polymerized hydrogel shows a slight opacity compared to standard  
145 buffer, the encapsulated cells were clearly visible under microscopy with no visible degradation  
146 in image quality (Figure 3). We then assessed whether the hydrogel impaired immunofluorescence  
147 microscopy by staining 22RV1 tumor cells using fluorescence conjugated antibodies specific for

## Lossless Immunocytochemistry

148 EpCAM and pan-cytokeratin (Figure 4). The cells were clearly visible and the absence of  
149 background fluorescence indicates that the unbound antibodies were not adsorbed by the hydrogel,  
150 but were efficiently washed away. In order to determine whether fluorescence intensity was  
151 hindered by hydrogel encapsulation, we measured the fluorescence intensity of cells from the  
152 standard ICC sample and the hydrogel encapsulated sample. We measured the mean fluorescent  
153 intensity (MFI) from each cell using a 40×40 pixel square area surrounding each cell. The  
154 measured MFI did not show a significant difference between the standard ICC sample and  
155 hydrogel encapsulated sample (Figure 5). An important consideration was that all staining  
156 parameters were optimized using the standard ICC protocol and the conditions did not require re-  
157 optimization for hydrogel encapsulated cells. Thus, cell staining could be achieved under standard  
158 conditions in <2 hours.

### 159 **Cell Loss Comparison**

160 We investigate cell loss during ICC resulting from convention protocol, Cytospin, and hydrogel  
161 encapsulation. Using 22RV1 prostate cancer cells as a model, we generated a 10-fold dilution  
162 series containing 10 to 10,000 cells, and then immunostained the samples using standard ICC,  
163 Cytospin, and hydrogel encapsulation. To measure cell loss, we performed triplicate experiments  
164 where cells from each specimen were enumerated by two independent reviewers before and after  
165 ICC (Figure 6). Cells stained using traditional ICC and Cytospin retained less than 50% of the  
166 cells during immunostaining regardless of the number of starting cells in the sample. In contrast,  
167 the hydrogel encapsulated cell sample retained 97-99% of input cells following immunostaining.  
168 The small deviation from ideal likely resulted from incomplete staining rather than cell loss since  
169 there are invariably a small fraction of a cell sample that will not stain. The most significant  
170 difference in cell loss was observed when fewer than 100 input cells were stained. Under these

## Lossless Immunocytochemistry

171 situations, almost all (>84%) cells were lost using standard ICC and Cytospin. In fact, Cytospin  
172 failed to retain any cells when there were only 10 cells in the initial sample. Together, these results  
173 show that hydrogel encapsulation permits virtually lossless immunostaining that is robust  
174 regardless of the starting number of cells in the sample.

### 175 **Conclusions**

176 This technical note presents a porous hydrogel thin-film for encapsulating cells during  
177 immunocytochemistry in order to eliminate cell loss resulting from washing and centrifugation.  
178 We show that this hydrogel thin-film is permeable to immunoglobulins, stable enough to withstand  
179 pipetting, and allows immunostaining to be performed directly on standard imaging well plates.  
180 Compared to standard ICC and Cytospin methods that become highly lossy for small cell samples  
181 (<10,000 cells), this process is lossless and can be used to stain <10 cells in a well. Furthermore,  
182 this process requires only a single centrifugation step, compared to >8 steps for standard ICC,  
183 which greatly improves compatibility with robotic systems. Ultimately, this simple and novel  
184 application of hydrogels for ICC could greatly improve small cell sample biological assays, such  
185 as drug screening on primary cells and identification of rare cells, such as circulating tumor cells.

186



## Lossless Immunocytochemistry

### 187 **Methods**

#### 188 **Chemicals and Hydrogel Preparation**

189 The cell capture imaging reagent (LMR001) was purchased from MilliporeSigma. The  
190 paraformaldehyde (PFA), and Tween-20 were purchased from Sigma-Aldrich. Each solution was  
191 freshly prepared prior to experiments.

#### 192 **Cell Culture**

193 The cell line 22RV1 (human prostate carcinoma, ATCC CRL2505) was used for immunostaining  
194 experiments. This cell line was cultured in RPMI-1640 culture media containing 10% Fetal Bovine  
195 Serum (Gibco) and 1% penicillin-streptomycin (Gibco) at 5% CO<sub>2</sub> at 37°C. Cells were re-  
196 suspended using 0.25% Trypsin-EDTA (Gibco), to generate a 10-fold dilution series from 10<sup>4</sup>-10<sup>5</sup>  
197 cells per 40 µl culture media.

#### 198 **Cell Encapsulation**

199 To encapsulate the cells in hydrogel, each cell suspension and 40 µL of PBS buffer was first loaded  
200 into one well in a 384-high contrast imaging well-plate (Corning). Next, 6.5 µL of the cell capture  
201 imaging reagent solution is pipetted gently with minimal mixing. The imaging well-plate was then  
202 centrifuged for 3 minutes at 3800 rpm (Accuspin 1R, Fisher scientific), and immediately proceeded  
203 to next step.

#### 204 **Photo-polymerization**

205 To form a hydrogel thin-film, the previously prepared plate was exposed to UV light using a 375  
206 nm UV LED (M375L3, Thorlabs) powered by a LED driver (LEDD1B, Thorlabs), or a cold cathod

## Lossless Immunocytochemistry

207 fluorescent lamp (CCFL) UV lamp ( $\lambda=302$  nm) in a gel imaging system (Gel Doc XR+, Bio-Rad).  
208 For UV LED system, the center of the LED was aligned with the center of the each well with 0.5  
209 mm gap and exposed for 5 seconds under drive current of 700 mA, which provides 470 mW output  
210 power. For the gel imaging system, the location of CCFL UV lamp was pre-marked, and 3 rows  
211 of well-plate were aligned on the center of each UV lamp. The exposure was controlled by Image  
212 Lab software (Bio-Rad) same as regular DNA gel imaging with a 20 second exposure.

### 213 **Cytospin Preparation**

214 Cytospin was performed by depositing a 40  $\mu$ L cell suspension directly onto a BSA-coated glass  
215 slide using a cytocentrifuge (Cytospin 2, Shadon) at 700 rpm for 3 minutes with low acceleration.

### 216 **Immunocytochemistry**

217 Immunocytochemistry was performed by first fixing cells in 4% paraformaldehyde for 10 minutes,  
218 washing twice with PBS and permeabilizing the cells with 0.025% Tween-20 for 15 minutes. After  
219 washing the cells twice more with PBS, the cells were blocked with 3% bovine serum albumin  
220 BSA (30 min) and stained for one hour with DAPI (1  $\mu$ M) for DNA, EpCAM-Alexa Fluor 488  
221 (1:100 dilution) and Pan-Keratin-Alexa Fluor 647 (1:100 dilution). ICC was performed in parallel  
222 on matching samples that were either cytospun onto a glass slide, hydrogel-encapsulated in an  
223 imaging plate or non-encapsulated within an imaging plate. This protocol differed between cell  
224 specimens because washing of non-encapsulated cells involved adding 40  $\mu$ L of PBS followed by  
225 centrifugation (3800 rpm, 3 min), washing of cytospin slides employed gentle PBS rinsing and the  
226 washing of hydrogel encapsulated cells involved adding PBS and mixing by pipette 10 times.  
227 Immunostained cells were directly imaged using both bright field and fluorescent microscopy,  
228 using a Nikon Ti-E inverted fluorescent microscope with 10x, 20x and 60x magnification with a

## Lossless Immunocytochemistry

229 high-resolution camera or a Zeiss laser scanning confocal microscope LSM 780 at 40x  
230 magnification.

### 231 **Cell Counting and Statistical Analysis**

232 Both the initial (prior to plating) and final numbers of all 3 matching ICC samples were manually  
233 counted by two individuals from the obtained images using ImageJ software. Experiments were  
234 performed 3 times for each cell dilution. Results from the count were averaged and plotted using  
235 GraphPad Prism.

236

## Lossless Immunocytochemistry

237 **Acknowledgments:** We thank Peter Black for providing the 22RV1 cell line. Jeong Hyun Lee has  
238 been supported by the UBC Four Year Fellowship. Emily Park has been supported by the Michael  
239 Smith Foundation for Health Research Trainee Award. Kerryn Matthews has been supported by  
240 the MITACS Accelerate Postdoctoral Fellowship. This work has been supported by grants from  
241 Canadian Institutes of Health Research (312371, 322375, 362500, 381129), Natural Science and  
242 Engineering Research Council of Canada (2015-06541, 508392-17), and Prostate Cancer Canada  
243 (D2016-1306).

244 **Disclosure of Conflicts of Interest:** H.M. and J.H.L. are inventors on a patent application  
245 describing the hydrogel thin-film technology presented in this manuscript.

246

## Lossless Immunocytochemistry

### 247 **References**

- 248 1. de Bono JS, Scher HI, Montgomery RB, et al. Circulating tumor cells predict survival benefit  
249 from treatment in metastatic castration-resistant prostate cancer. *Clinical cancer research : an*  
250 *official journal of the American Association for Cancer Research*. 2008;14(19):6302–9.
- 251 2. Cristofanilli M, Budd GT, Ellis MJ, et al. Circulating tumor cells, disease progression, and  
252 survival in metastatic breast cancer. *The New England journal of medicine*. 2004;351(8):781–  
253 91.
- 254 3. Cohen SJ, Punt CJA, Iannotti N, et al. Relationship of circulating tumor cells to tumor  
255 response, progression-free survival, and overall survival in patients with metastatic colorectal  
256 cancer. *Journal of clinical oncology : official journal of the American Society of Clinical*  
257 *Oncology*. 2008;26(19):3213–21.
- 258 4. Miller MC, Doyle G V, Terstappen LWMM. Significance of Circulating Tumor Cells Detected  
259 by the CellSearch System in Patients with Metastatic Breast Colorectal and Prostate Cancer.  
260 *Journal of oncology*. 2010;2010:617421.
- 261 5. Hamada H, Arinami T, Kubo T, Hamaguchi H, Iwasaki H. Fetal nucleated cells in maternal  
262 peripheral blood: frequency and relationship to gestational age. *Human genetics*.  
263 1993;91(5):427–32.
- 264 6. Masuda H-T, Ishihara S, Harada I, et al. Coating extracellular matrix proteins on a (3-  
265 aminopropyl)triethoxysilane-treated glass substrate for improved cell culture. *BioTechniques*.  
266 2014;172(56):172–179.
- 267 7. Srinivasan S. A method to fix and permeabilize isolated adult mouse cardiomyocytes for  
268 immuno-staining and confocal imaging. *Protocol Exchange*. 2011;
- 269 8. Allen L-AH. Immunofluorescence and confocal microscopy of neutrophils. *Methods in*  
270 *molecular biology (Clifton, N.J.)*. 2014;1124:251–68.
- 271 9. Koh CM. Preparation of Cells for Microscopy using Cytospin. *Methods in enzymology*.  
272 2013;533:235–240.
- 273 10. Krishnamurthy V, Satish S, Doreswamy SM, Vimalambike MG. Comparison of Cell  
274 Preparations between Commercially Available Filter Cards of the Cytospin with Custom Made  
275 Filter Cards. *Journal of clinical and diagnostic research : JCDR*. 2016;10(7):EC18-20.
- 276 11. Dhar M, Pao E, Renier C, et al. Label-free enumeration, collection and downstream cytological  
277 and cytogenetic analysis of circulating tumor cells. *Nature Publishing Group*. 2016;
- 278 12. Nakayama T, Mihara K, Kawata J, Kimura H, Saitoh H. Adhesion of suspension cells on a  
279 coverslip in serum-free conditions. *Analytical Biochemistry*. 2014;466:1–3.
- 280 13. Vartdal F, Vandvik B, Lea T. Immunofluorescence staining of agarose-embedded cells: A new  
281 technique developed for immunological characterization of markers on a small number of  
282 cells. *Journal of Immunological Methods*. 1986;92(1):125–129.
- 283 14. Horng Tan Y, Liu M, Nolting B, et al. A Nanoengineering Approach for Investigation and  
284 Regulation of Protein Immobilization. *ACS Nano*. 2008;2(11):2374–2384.
- 285 15. Lee J-O, So H-M, Jeon E-K, et al. Aptamers as molecular recognition elements for electrical  
286 nanobiosensors. *Analytical and Bioanalytical Chemistry*. 2008;390(4):1023–1032.
- 287 16. Beamish JA, Zhu J, Kottke-Marchant K, Marchant RE. The effects of monoacrylated  
288 poly(ethylene glycol) on the properties of poly(ethylene glycol) diacrylate hydrogels used for  
289 tissue engineering. *Journal of biomedical materials research. Part A*. 2010;92(2):441–50.

## Lossless Immunocytochemistry

- 290 17. Van Den Bulcke a I, Bogdanov B, De Rooze N, et al. Structural and rheological properties of  
291 methacrylamide modified gelatin hydrogels. *Biomacromolecules*. 2000;1(1):31–38.
- 292 18. Artyukhov AA, Shtilman MI, Kuskov AN, et al. Polyvinyl alcohol cross-linked macroporous  
293 polymeric hydrogels: Structure formation and regularity investigation. *Journal of Non-*  
294 *Crystalline Solids*. 2011;357(2):700–706.
- 295 19. Gemeinhart R a., Park H, Park K. Pore structure of superporous hydrogels. *Polymers for*  
296 *Advanced Technologies*. 2000;11(8–12):617–625.
- 297 20. Hoffman AS. Hydrogels for biomedical applications. *Advanced Drug Delivery Reviews*.  
298 2012;64:18–23.
- 299 21. Ahmed EM. Hydrogel: Preparation, characterization, and applications: A review. *Journal of*  
300 *Advanced Research*. 2015;6(2):105–121.
- 301 22. Roy TD, Simon JL, Ricci JL, et al. Performance of degradable composite bone repair products  
302 made via three-dimensional fabrication techniques. *Journal of Biomedical Materials*  
303 *Research*. 2003;66A(2):283–291.
- 304 23. Kim HJ, Kim U-J, Vunjak-Novakovic G, Min B-H, Kaplan DL. Influence of macroporous  
305 protein scaffolds on bone tissue engineering from bone marrow stem cells. *Biomaterials*.  
306 2005;26(21):4442–4452.
- 307 24. Griffon DJ, Sedighi MR, Schaeffer D V., Eurell JA, Johnson AL. Chitosan scaffolds:  
308 Interconnective pore size and cartilage engineering. *Acta Biomaterialia*. 2006;2(3):313–320.
- 309 25. Annabi N, Nichol JW, Zhong X, et al. Controlling the porosity and microarchitecture of  
310 hydrogels for tissue engineering. *Tissue engineering. Part B*. 2010;16(4):371–383.
- 311 26. Raic A, Rödling L, Kalbacher H, Lee-Thedieck C. Biomimetic macroporous PEG hydrogels  
312 as 3D scaffolds for the multiplication of human hematopoietic stem and progenitor cells.  
313 *Biomaterials*. 2014;35(3):929–940.
- 314 27. Lee AG, Arena CP, Beebe DJ, Palecek SP. Development of Macroporous Poly(ethylene  
315 glycol) Hydrogel Arrays Within Microfluidic Channels. *Biomacromolecules*.  
316 2010;11(12):3316–3324.
- 317 28. Zipursky A, Bow E, Seshadri RS, Brown EJ. Leukocyte density and volume in normal subjects  
318 and in patients with acute lymphoblastic leukemia. *Blood*. 1976;48(3):361 LP – 371.
- 319

## Lossless Immunocytochemistry

### 320 **Figure Legends**

321 **Fig. 1. Schematic of the hydrogel.** (a) cells encapsulated in photo-polymerized hydrogel. (b) the  
322 typical hydrogel is impermeable to immunoglobulins. (c) the hydrogel formulated for  
323 immunostaining is permeable to immunoglobulins.

324 **Fig. 2. The general approach for lossless immunocytochemistry using hydrogel-encapsulated**  
325 **cells.** (a) The cell capture solution and cell suspension is added to a standard (unmodified) glass  
326 bottom imaging well-plate. The plate is centrifuged to position the cells at the bottom of the plate  
327 and the plate is exposed to UV light for 5 s. (b) The supernatant, along with uncured cell capture  
328 solution, is removed from the well by pipetting. (c) Immunostaining steps for fixation,  
329 permeabilization, immunostaining, as well as multiple washing steps are performed without  
330 additional centrifugation steps. (d) Image acquisition can be performed directly on the imaging  
331 plate.

332 **Fig. 3. Comparison of bright-field microscopy image of cells encapsulated in hydrogels.** (a)  
333 before and (b) after photo-polymerization. The polymerized hydrogel shows a slight opacity after  
334 photo-polymerization, but there is no significant change in microscopy image quality.

335 **Fig. 4. Micrographs of hydrogel encapsulated cells stained with fluorescent antibodies.** (a)  
336 40X image from a well in a 384 well microtiter plate where ~1,000 cells are encapsulated in  
337 hydrogel and subsequently stained with DAPI (blue), EpCam-Alexafluor-488 (green), Pan-  
338 Keratin-Alexafluor-647 (red). (b-e) Close-ups of merged and separated channels.

339 **Fig. 5. Cell retention comparison.** Cell retention following immunostaining of cells using  
340 standard ICC, ICC following Cytospin, and hydrogel-encapsulation. Each experiment was  
341 performed in triplicate and cells were independently enumerated by two reviewers. Error bars rep  
342 resent the standard deviation (n=6).

343

## Lossless Immunocytochemistry

### 344 **Figures**

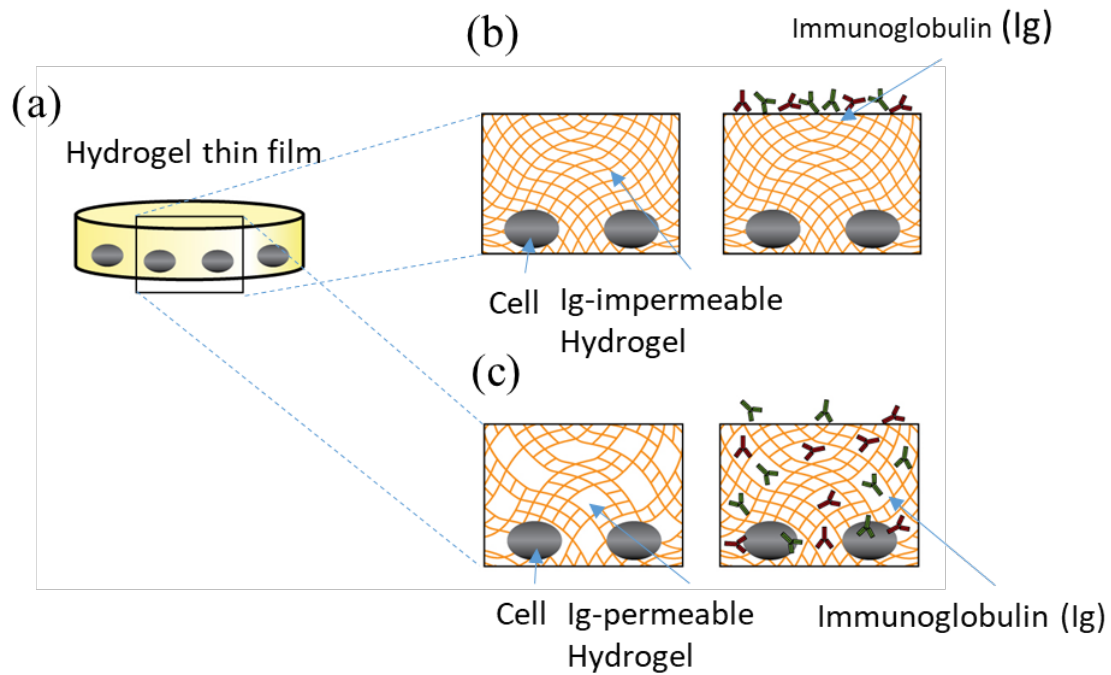

345

346 **Fig. 1. Schematic of the hydrogel.** (a) cells encapsulated in photo-polymerized hydrogel. (b) the  
347 typical hydrogel is impermeable to immunoglobulins. (c) the hydrogel formulated for  
348 immunostaining is permeable to immunoglobulins.



## Lossless Immunocytochemistry

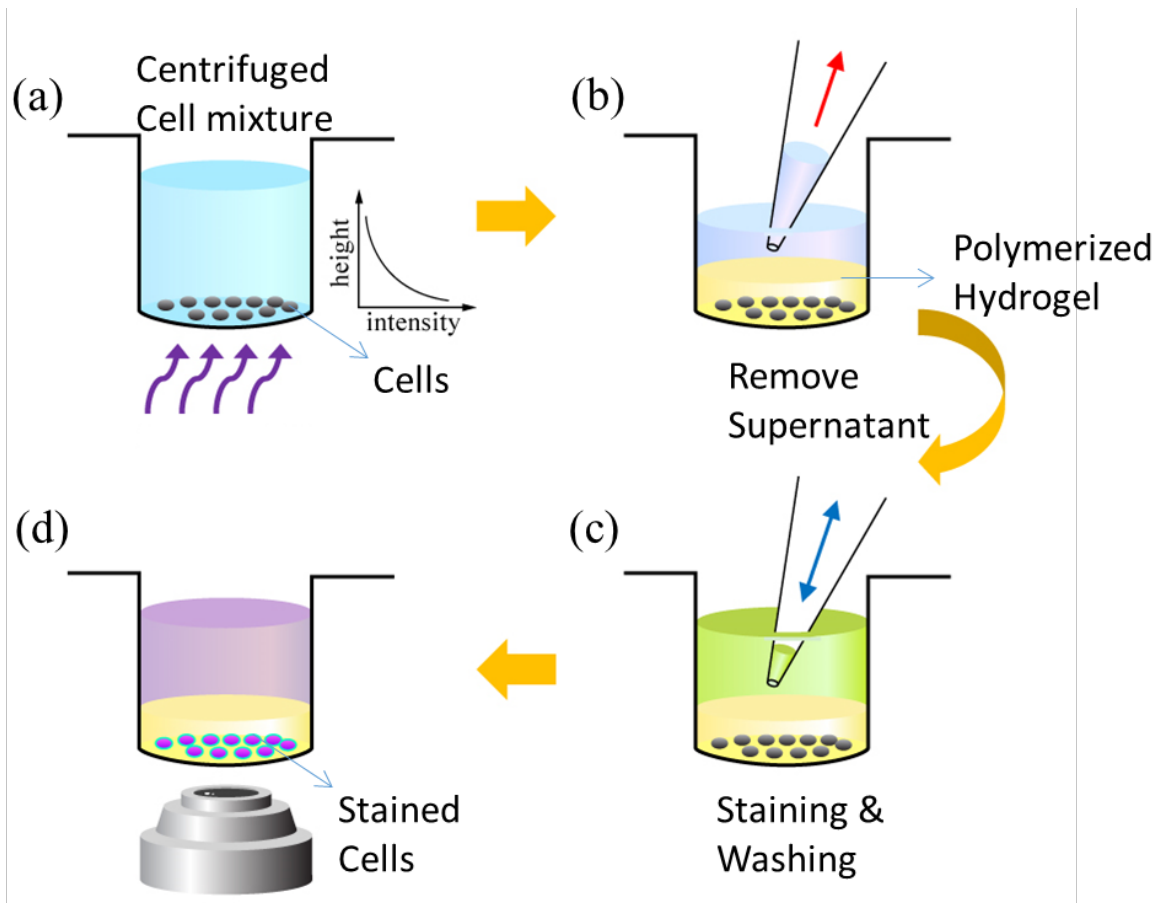

349

350 **Fig. 2. The general approach for lossless immunocytochemistry using hydrogel-encapsulated**  
351 **cells.** (a) The cell capture solution and cell suspension is added to a standard (unmodified) glass  
352 bottom imaging well-plate. The plate is centrifuged to position the cells at the bottom of the plate  
353 and the plate is exposed to UV light for 5 s. (b) The supernatant, along with uncured cell capture  
354 solution, is removed from the well by pipetting. (c) Immunostaining steps for fixation,  
355 permeabilization, immunostaining, as well as multiple washing steps are performed without  
356 additional centrifugation steps. (d) Image acquisition can be performed directly on the imaging  
357 plate.

358

## Lossless Immunocytochemistry

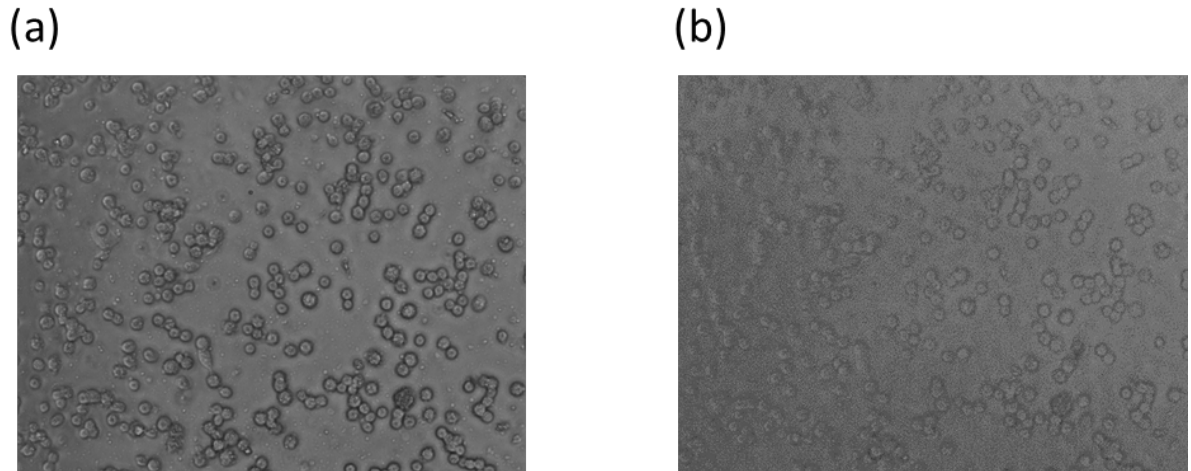

359

360 **Fig. 3. Comparison of bright-field microscopy image of cells encapsulated in hydrogels.** (a)  
361 before and (b) after photo-polymerization. The polymerized hydrogel shows a slight opacity after  
362 photo-polymerization, but there is no significant change in microscopy image quality.

363

364

365

366

## Lossless Immunocytochemistry

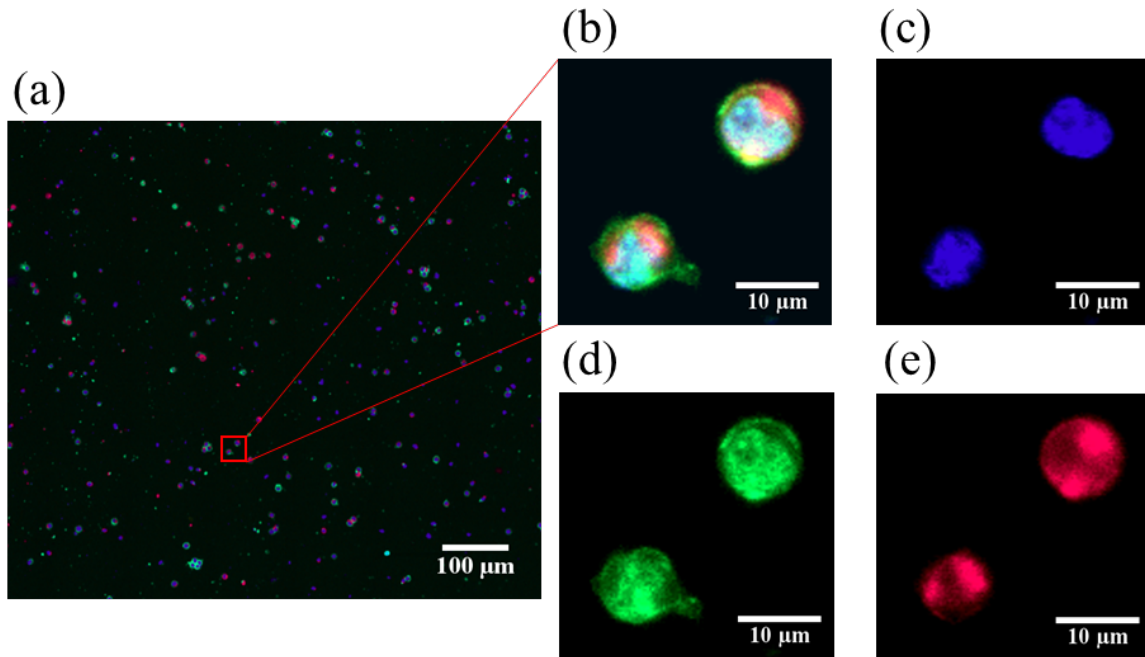

367

368 **Fig. 4. Micrographs of hydrogel encapsulated cells stained with fluorescent antibodies.** (a)

369 40X image from a well in a 384 well microtiter plate where ~1,000 cells are encapsulated in

370 hydrogel and subsequently stained with DAPI (blue), EpCam-Alexafluor-488 (green), Pan-

371 Keratin-Alexafluor-647 (red). (b-e) Close-ups of merged and separated channels.

372

## Lossless Immunocytochemistry

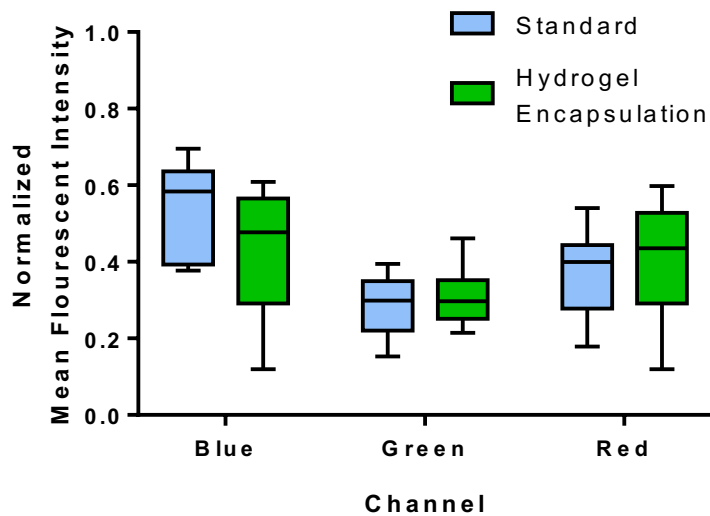

373

374 **Fig 5. Comparison of mean fluorescent intensity.** The mean fluorescent intensity (MFI) of cells  
375 following immunostaining using standard ICC and hydrogel-encapsulation. The MFI was  
376 measured from a 40×40 pixel square window surrounding each cell for each channel. Error bars  
377 represent maximum and minimum value (n=10).

378

## Lossless Immunocytochemistry

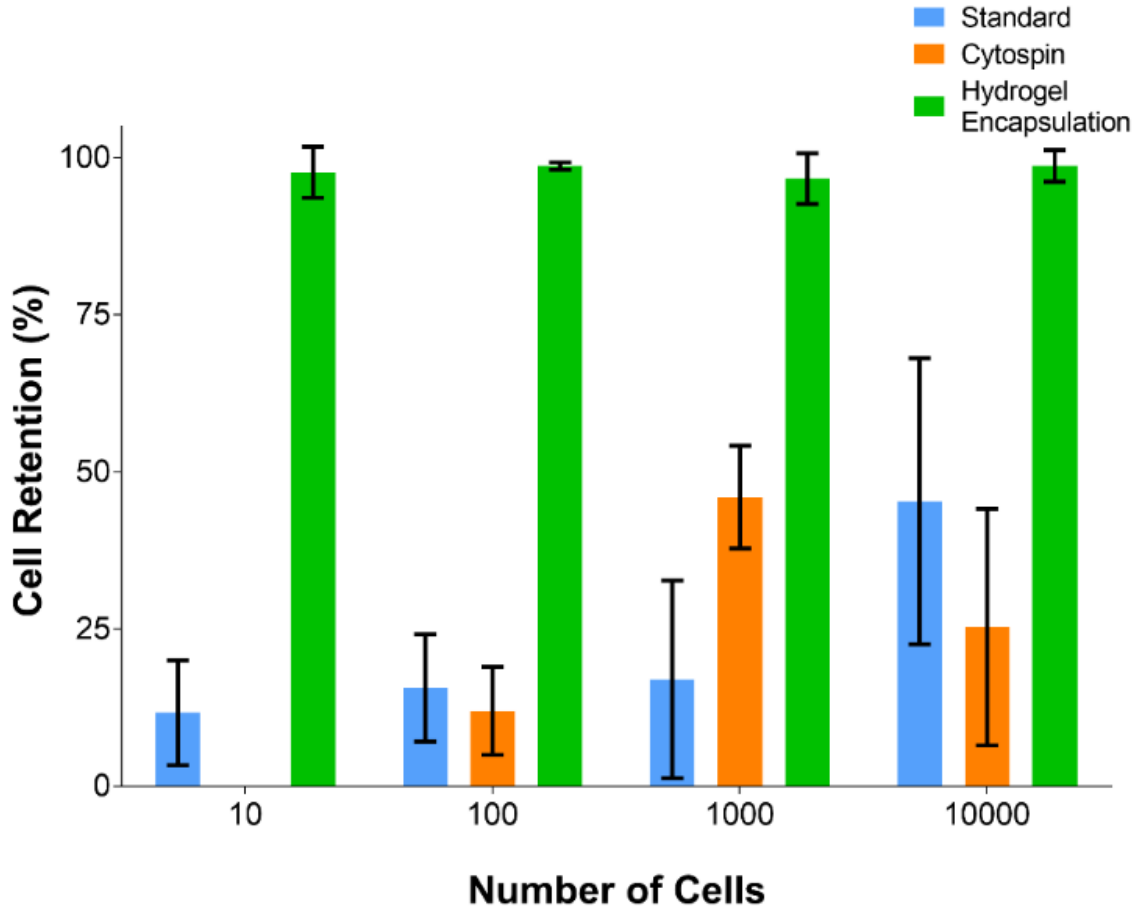

379

380 **Fig. 6. Cell retention comparison.** Cell retention following immunostaining of cells using  
381 standard ICC, ICC following Cytospin, and hydrogel-encapsulation. Each experiment was  
382 performed in triplicate and cells were independently enumerated by two reviewers. Error bars rep  
383 resent the standard deviation (n=6).

384
